# Supplementary material for: Dependence of the cyclization of branched tetraethers on soil moisture in alkaline soils from arid–subhumid China: implications for palaeorainfall reconstructions on the Chinese Loess Plateau
Source: Copernicus journal article supplement (doi:10.5194/bg-11-6755-2014), 2014-12-08
Supplement: Supplementary file 1 [file bg-11-6755-2014-supplement.zip]

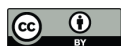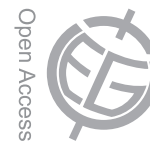

## *Supplement of*

# **Dependence of the cyclization of branched tetraethers on soil moisture in alkaline soils from arid–subhumid China: implications for palaeorainfall reconstructions on the Chinese Loess Plateau**

**H. Wang et al.**

*Correspondence to:* W. Liu ([liuwg@loess.llqg.ac.cn](mailto:liuwg@loess.llqg.ac.cn)) and C. L. Zhang ([archaeazhang\\_1@tongji.edu.cn](mailto:archaeazhang_1@tongji.edu.cn))

- [bg-11-6755-2014-supplement-cover-letter.pdf](#)
- Supplementary Table
  - [Supplementary Table 1.xls](#)
