# Supplementary material for: Dependence of the cyclization of branched tetraethers on soil moisture in alkaline soils from arid–subhumid China: implications for palaeorainfall reconstructions on the Chinese Loess Plateau
Source: Copernicus journal article supplement (doi:10.5194/bg-11-6755-2014), 2014-12-08
Supplement: Supplementary file 1 [file Supplementary Table 1.xls]

## Sheet: Supplementary Table 1
									Overview of the sampling sites, environmental variables (soil pH, SWC, MAP, MAGST, RH, MAE), MBT', CBT,reconstructed temperature and the relative abundance of bGDGTs for the Chinese alkaline soils used in RDA.
	No.	ID	Site	Latitude	Longgitude	Altitude	Soil pH	SWC (%)	MAP (mm)	MAGST (℃)	MARH (%)	MAAT (℃)	MAE(mm)	MBT'	CBT	MBT'/CBT-	MBT'/pH-	Chinese	Depth(cm)					fbGDGTs					Data source
																derived MAAT	derived MAAT	SSM MAAT		IIIa	IIIb	IIIc	IIa	IIb	IIc	Ia	Ib	Ic
	1	WLPS-1	Jingchuan	35°21'21.894"	107°41'6.163"	1063	7.82	16.2722	575	12.511	69.0833	10.236	1355.5	0.22892	0.539849	4.84559	6.88211	10.2628	0-5	0.176185	0.0125148	0	0.463003	0.118736	0.00350603	0.157556	0.0602973	0.0082019	This study
	2	WLPS-2	Jingchuan	35°21'16.357"	107°41'1.778"	1064	7.91667	13.7967	575	12.505	69.0833	10.23	1355.5	0.244696	0.452858	5.82788	7.69038	10.6557	0-5	0.195622	0.0114219	0	0.421767	0.121904	0.00738425	0.153405	0.0808363	0.00766003	This study
	3	WLPS-3	Jingchuan	35°21'16.573"	107°41'1.622"	1062	8	15.6818	575	12.517	69.0833	10.242	1355.5	0.282894	0.343589	7.63155	9.21634	11.8575	0-5	0.176763	0.0147178	0	0.405687	0.116003	0.00809916	0.138572	0.130724	0.00943382	This study
	4	WLPS-4	Longde	35°35'57.574"	106°01'2.898"	1989	7.90667	6.88525	492	8.7626	64.8333	6.1626	1268.5	0.133183	0.76898	0.578548	3.90265	8.52209	0-5	0.327379	0.0153141	0	0.461971	0.0562552	0.007938	0.0929394	0.0382037	0	This study
	5	WLPS-5	Longde	35°35'58.297"	106°00'59.728"	2021	7.88333	10.8814	492	8.5706	64.8333	5.9706	1268.5	0.136669	0.720243	0.962959	3.95344	8.22037	0-5	0.294969	0	0	0.486445	0.0819164	0	0.105799	0.0308703	0	This study
	6	WLPS-6	Longde	35°35'57.380"	106°00'59.603"	2017	7.96	6.44419	492	8.5946	64.8333	5.9946	1268.5	0.129748	0.67969	0.978345	3.93941	8.43415	0-5	0.284972	0.0176958	0	0.486318	0.0835617	0	0.0904284	0.0370237	0	This study
	7	WLPS-7	Gancaodian	35°47'9.466"	104°18'13.231"	1929	8.01667	15.8599	372.4	9.96407	63	6.63073	1377.2	0.128774	0.714051	0.753319	4.06863	8.42484	0-5	0.281857	0.0177112	0	0.495081	0.0788571	0	0.0919508	0.0345423	0	This study
	8	WLPS-8	Gancaodian	35°47'11.043"	104°18'12.397"	1922	7.85667	17.1111	372.4	10.0061	63	6.67273	1377.2	0.120984	0.814444	-0.0573846	3.34845	8.2942	0-5	0.276889	0.0158332	0	0.521916	0.0662928	0	0.0913457	0.0277231	0	This study
	9	WLPS-9	Gancaodian	35°47'12.696"	104°18'11.940"	1921	8.25667	16.2384	372.4	10.0121	63	6.67873	1377.2	0.115288	0.832137	-0.334284	4.30043	7.93182	0-5	0.301175	0	0	0.519957	0.0635799	0	0.0892081	0.02608	0	This study
	10	WLPS-10	Yongdeng	36°29'26.033"	103°23'58.472"	1884	8.59667	13.3475	284.3	10.0287	57.7	6.64123	1744.6	0.0965021	1.33065	-3.74324	4.63955	7.80645	0-5	0.305859	0.0106864	0	0.558396	0.023926	0.00566142	0.0847512	0.00611101	0.0046087	This study
	11	WLPS-11	Yongdeng	36°29'27.352"	103°23'56.563"	1882	8.53333	12.7083	284.3	10.0407	57.7	6.65323	1744.6	0.09323	1.10958	-2.59119	4.34812	7.6562	0-5	0.346804	0.0113583	0	0.503001	0.0363576	0.0103075	0.0771975	0.00872373	0.00624982	This study
	12	WLPS-12	Yongdeng	36°29'26.116"	103°23'57.509"	1879	8.38333	11.996	284.3	10.0587	57.7	6.67123	1744.6	0.0858982	1.19455	-3.30025	3.67196	7.57487	0-5	0.343925	0.0122578	0	0.521096	0.0296271	0.00824851	0.0705351	0.00817383	0.00613634	This study
	13	WLPS-13	Guliang	37°30'0.853"	102°52'34.941"	2162	8.30667	2.7933	352.3	8.12073	51.3333	5.19573	1871.9	0.09387	1.0818	-2.41384	3.72142	7.38752	0-5	0.37465	0	0	0.499948	0.0315321	0	0.0775652	0.0163047	0	This study
	14	WLPS-14	Guliang	37°30'0.263"	102°52'31.514"	2161	8.11	6.12669	352.3	8.12673	51.3333	5.20173	1871.9	0.0813256	1.07696	-2.77529	2.73608	6.77402	0-5	0.479879	0	0	0.409879	0.0289162	0	0.0700434	0.0112821	0	This study
	15	WLPS-15	Guliang	37°29'56.483"	102°52'42.411"	2068	8.33333	2.72512	352.3	8.68473	51.3333	5.75973	1871.9	0.0990034	0.929925	-1.39357	3.97074	7.34325	0-5	0.417207	0	0	0.445596	0.0381944	0	0.0759151	0.0230883	0	This study
	16	WLPS-16	Yongchang	38°15'8.88"	101°59'16.747"	1966	7.59333	6.4978	211.8	8.47373	51.8333	5.48207	2016.7	0.0901715	1.08039	-2.52051	1.55661	7.12807	0-5	0.458474	0.0110188	0	0.41334	0.0279893	0	0.0764638	0.012714	0	This study
	17	WLPS-17	Yongchang	38°15'8.463"	101°59'16.212"	1972	7.91333	13.7	211.8	8.43773	51.8333	5.44607	2016.7	0.0762849	1.01456	-2.57771	2.0037	6.72855	0-5	0.449228	0	0	0.433276	0.0412116	0	0.0689312	0.00735366	0	This study
	18	WLPS-18	Yongchang	38°15'16.131"	101°59'6.22"	1965	7.97333	3.85542	211.8	8.47973	51.8333	5.48807	2016.7	0.0813231	1.3091	-4.0916	2.34513	6.98833	0-5	0.419749	0	0	0.478641	0.020287	0	0.0744641	0.00685897	0	This study
	19	WLPS-19	Jingtai	37°20'44.919"	104°07'20.141"	1583	8.94667	0.437063	179.7	12.0541	47.5	9.34573	2251.3	0.0985792	0.976107	-1.66857	5.71057	7.68417	0-5	0.328587	0	0	0.512628	0.0488266	0.0113789	0.0843334	0.0142458	0	This study
	20	WLPS-20	Jingtai	37°20'44.889"	104°07'18.772"	1595	8.86	0.593472	179.7	11.9821	47.5	9.27373	2251.3	0.113494	0.841795	-0.444655	5.96549	7.90241	0-5	0.322591	0	0	0.483486	0.0663837	0.0140446	0.0964041	0.0170902	0	This study
	21	WLPS-21	Jingtai	37°20'46.190"	104°07'19.885"	1596	8.62333	0.449944	179.7	11.9761	47.5	9.26773	2251.3	0.118816	1.03399	-1.36944	5.46801	7.77618	0-5	0.339009	0	0	0.499408	0.0427676	0	0.105634	0.0131817	0	This study
	22	WLPS-22	Shapotou	37°26'7.060"	104°54'50.546"	1393	8.61333	0.462107	176.5	10.8129	55.4167	8.20453	1823.8	0.138749	0.793652	0.611224	6.11137	8.30972	0-5	0.308626	0	0	0.490564	0.0620603	0	0.105025	0.0337242	0	This study
	23	WLPS-23	Shapotou	37°26'8.277"	104°54'49.177"	1411	8.7	0.763359	176.5	10.7049	55.4167	8.09653	1823.8	0.149932	1.08044	-0.668186	6.73621	8.53844	0-5	0.256311	0	0	0.55221	0.0415474	0	0.134425	0.015507	0	This study
	24	WLPS-24	Shapotou	37°26'8.444"	104°54'48.890"	1410	8.69333	0.400802	176.5	10.7109	55.4167	8.10253	1823.8	0.150146	0.836679	0.720562	6.72436	8.45686	0-5	0.299196	0	0	0.490786	0.0598717	0	0.120921	0.0292255	0	This study
	25	WLPS-25	Zhongwei	37°32'18.667"	105°52'44.947"	1209	8.52333	1.32325	192.3	12.5214	52.4167	9.75473	1898.3	0.135206	0.977084	-0.538673	5.73453	8.25236	0-5	0.272288	0	0	0.54009	0.0524163	0	0.118224	0.0169821	0	This study
	26	WLPS-26	Zhongwei	37°32'18.913"	105°52'46.029"	1208	8.50333	3.29861	192.3	12.5274	52.4167	9.76073	1898.3	0.120676	0.753976	0.275926	5.18754	8.14492	0-5	0.255152	0.0116677	0	0.524354	0.0895574	0	0.0989883	0.0202801	0	This study
	27	WLPS-27	Zhongwei	37°32'17.008"	105°52'47.017"	1213	8.77333	1.09091	192.3	12.4974	52.4167	9.73073	1898.3	0.127012	1.13491	-1.68759	6.1733	8.17477	0-5	0.293653	0	0	0.549822	0.0295141	0	0.108288	0.0187236	0	This study
	28	WLPS-28	Helan	38°54'50.744"	106°12'51.731"	1180	8.66667	0.895255	167.2	12.6179	47.8333	9.7262	2145.8	0.161073	1.04429	-0.117849	7.01645	9.01441	0-5	0.208509	0.00870164	0	0.5714	0.0474515	0.00426598	0.139871	0.0167795	0.00302084	This study
	29	WLPS-29	Helan	38°54'50.576"	106°12'50.800"	1187	8.47333	1.36268	167.2	12.5759	47.8333	9.6842	2145.8	0.131296	1.12947	-1.5239	5.45973	8.41459	0-5	0.238652	0.00738266	0	0.583946	0.0396925	0	0.117925	0.0124018	0	This study
	30	WLPS-30	Helan	38°54'50.576"	106°12'50.800"	1187	8.1	1.57274	167.2	12.5759	47.8333	9.6842	2145.8	0.122518	1.31439	-2.84453	4.09608	8.25375	0-2	0.24859	0.00616719	0	0.595688	0.0277925	0	0.113004	0.00875795	0	This study
	31	WLPS-31	Helan	38°54'50.576"	106°12'50.800"	1187	8.58333	1.35593	167.2	12.5759	47.8333	9.6842	2145.8	0.151376	1.07559	-0.595957	6.45122	8.79386	2-5	0.211354	0.00740486	0	0.585636	0.0453505	0	0.13505	0.0152049	0	This study
	32	WLPS-32	Helan	38°54'49.356"	106°12'51.789"	1184	8.42	1.01466	167.2	12.5939	47.8333	9.7022	2145.8	0.140415	0.999887	-0.506504	5.61458	8.58563	0-5	0.230279	0.0090873	0	0.569195	0.0522998	0	0.122274	0.0168649	0	This study
	33	WLPS-33	Shizuishan	39°06'53.578"	106°33'49.224"	1107	8.22667	0.961538	177.8	12.2669	53.6667	9.36687	1707.8	0.115043	1.27231	-2.83763	4.20638	7.9105	0-5	0.308914	0	0	0.553186	0.0228567	0	0.102855	0.0121883	0	This study
	34	WLPS-34	Shizuishan	39°06'33.116"	106°33'48.900"	1117	8.6	0.784656	177.8	12.2069	53.6667	9.30687	1707.8	0.138495	1.15738	-1.45899	6.06467	8.34417	0-5	0.280244	0	0	0.550457	0.0308044	0	0.122463	0.0160321	0	This study
	35	WLPS-35	Shizuishan	39°06'54.033"	106°33'49.715"	1116	8.37333	1.00402	177.8	12.2129	53.6667	9.31287	1707.8	0.14303	1.17436	-1.41467	5.56929	8.4132	0-5	0.277667	0	0	0.549512	0.0297906	0	0.127506	0.0155244	0	This study
	36	WLPS-36	Wuhai	39°32'35.258"	106°46'13.388"	1088	8.33333	0.464756	152.5	12.6258	42.9167	9.91743	2977.75	0.168331	0.802135	1.48016	6.30778	8.80376	0-5	0.255322	0	0	0.503285	0.0730618	0	0.139947	0.0283837	0	This study
	37	WLPS-37	Wuhai	39°32'34.856"	106°46'13.060"	1077	8.49	0.453172	152.5	12.6918	42.9167	9.98343	2977.75	0.208549	0.669704	3.4778	8.1116	9.9001	0-5	0.21766	0	0	0.501139	0.0726523	0	0.143324	0.0652253	0	This study
	38	WLPS-38	DengkouA	40°09'14.298"	106°54'4.591"	1072	8.66333	0.495458	143.3	11.1831	46.9167	8.68313	2494.5	0.188588	0.630684	3.08026	7.93445	9.40939	0-5	0.186951	0	0	0.517638	0.106822	0	0.141206	0.0473828	0	This study
	39	WLPS-39	DengkouA	40°09'14.304"	106°54'4.590"	1073	8.53667	0.616333	143.3	11.1771	46.9167	8.67713	2494.5	0.172002	0.734195	1.97916	7.01304	9.0936	0-5	0.219227	0	0	0.527743	0.0810282	0	0.13146	0.0405413	0	This study
	40	WLPS-40	DengkouA	40°09'13.827"	106°54'5.567"	1063	8.40333	0.544747	143.3	11.2371	46.9167	8.73713	2494.5	0.237334	0.683035	4.29456	8.83408	10.3129	0-5	0.1797	0	0	0.500407	0.0825587	0	0.178945	0.0583895	0	This study
	41	WLPS-41	DengkouB	40°37'22.691"	107°02'27.172"	1038	8.61667	0.687285	139.95	11.0516	48.7917	8.35573	2224.25	0.137966	0.817802	0.449998	6.09449	8.36145	0-5	0.253365	0	0	0.534902	0.0737675	0	0.113149	0.0248167	0	This study
	42	WLPS-42	Wuyuan	41°18'35.383"	108°25'30.543"	1069	8.7	2.6383	184.5	9.41277	50.125	7.22527	2221.55	0.175893	0.998252	0.602586	7.61135	9.05487	0-5	0.23088	0	0	0.546775	0.0464522	0	0.152169	0.0237239	0	This study
	43	WLPS-43	Wuyuan	41°18'32.605"	108°25'30.906"	1060	8.62667	3.65093	184.5	9.46677	50.125	7.27927	2221.55	0.185776	0.999334	0.90284	7.73478	9.32273	0-5	0.202483	0	0	0.56531	0.0464307	0	0.159604	0.0261721	0	This study
	44	WLPS-44	Wuyuan	41°18'29.645"	108°25'31.157"	1043	8.55333	2.7668	184.5	9.56877	50.125	7.38127	2221.55	0.175545	0.728894	2.11908	7.18017	9.36634	0-5	0.218366	0.0153748	0	0.498483	0.0842228	0.0107075	0.132403	0.0335532	0.00688981	This study
	45	WLPS-45	Wuyuan	41°18'1.915"	108°22'40.871"	1030	8.59333	3.37395	184.5	9.64677	50.125	7.45927	2221.55	0.198194	1.07227	0.874243	8.05805	9.49065	0-5	0.192144	0	0	0.567747	0.0419147	0	0.177047	0.0211473	0	This study
	46	WLPS-46	Baiyunebo	41°24'35.421"	109°57'47.394"	1572	8.10333	7.81818	270.25	6.23163	51.4167	3.80663	2304.05	0.143956	0.723756	1.16894	4.82829	8.72948	0-5	0.261316	0.0139039	0	0.495369	0.0802026	0.00725309	0.102008	0.032645	0.0073017	This study
	47	WLPS-47	Baiyunebo	41°24'36.075"	109°57'47.449"	1573	8.14333	7.49766	270.25	6.22563	51.4167	3.80063	2304.05	0.154881	0.738489	1.42409	5.31098	8.89574	0-5	0.239155	0.0123798	0	0.507139	0.0825314	0.00583081	0.115561	0.0311763	0.00622674	This study
	48	WLPS-48	Baiyunebo	41°24'34.148"	109°57'48.205"	1570	7.86667	9.24025	270.25	6.24363	51.4167	3.81863	2304.05	0.149542	0.753547	1.17318	4.33972	8.78786	0-5	0.250102	0.0133528	0	0.505657	0.0784427	0.00490019	0.110259	0.0301933	0.00709307	This study
	49	WLPS-49	Guyang	41°05'14.487"	110°02'48.327"	1438	8.1	5.99572	291.1	7.09273	51.1667	4.7844	1945	0.181339	0.854335	1.58743	6.07893	9.51597	0-5	0.180452	0.00894586	0	0.561852	0.0641186	0.00491474	0.133256	0.0330929	0.0133677	This study
	50	WLPS-50	Guyang	41°05'14.487"	110°02'48.327"	1438	8.20667	6.74044	291.1	7.09273	51.1667	4.7844	1945	0.182865	0.876148	1.51104	6.43543	9.53682	0-5	0.177605	0.0103915	0	0.564909	0.0623962	0.0037342	0.141438	0.0315479	0.0079785	This study
	51	WLPS-51	Guyang	41°05'14.487"	110°02'48.327"	1438	8.11	5.74713	291.1	7.09273	51.1667	4.7844	1945	0.162179	0.794569	1.33234	5.46165	9.07828	0-5	0.226864	0.0112018	0	0.526502	0.0706566	0.00441311	0.120713	0.0332108	0.00643864	This study
	52	WLPS-52	Baotou	40°19'41.670"	110°04'5.674"	1570	7.82	9.38776	298	6.7128	50.7917	4.3503	1978.75	0.185643	0.581542	3.26759	5.42323	9.50495	0-5	0.233077	0.0128758	0	0.459679	0.102217	0.00889869	0.121895	0.0502109	0.0111467	This study
	53	WLPS-53	Baotou	40°19'41.670"	110°04'5.674"	1570	7.83	6.92464	298	6.7128	50.7917	4.3503	1978.75	0.158594	0.640577	2.09435	4.54001	8.92946	0-5	0.264687	0.0129735	0	0.467814	0.0914123	0.00657661	0.107557	0.0402226	0.00875693	This study
	54	WLPS-54	Baotou	40°19'41.670"	110°04'5.674"	1570	7.93333	14.4422	298	6.7128	50.7917	4.3503	1978.75	0.127388	0.583288	1.45179	3.78359	8.16643	0-5	0.303833	0.017943	0	0.444086	0.109036	0	0.0937421	0.0313603	0	This study
	55	WLPS-55	DongshengA	39°55'40.441"	109°58'54.685"	1443	8.14	12.7013	368	8.84673	48.5	6.83007	2271.5	0.240175	0.511256	5.35661	8.17671	10.6571	0-5	0.173225	0.0176695	0	0.452321	0.114704	0.00614959	0.153178	0.0718727	0.0108805	This study
	56	WLPS-56	DongshengA	39°55'40.434"	109°58'53.736"	1439	8.16333	12.8028	368	8.87073	48.5	6.85407	2271.5	0.209482	0.478658	4.58994	7.20876	10.0179	0-5	0.191246	0.0133827	0	0.4529	0.12864	0.00715269	0.129924	0.0649481	0.0118059	This study
	57	WLPS-57	DongshengA	39°55'38.677"	109°58'55.121"	1431	8.01	14.557	368	8.91873	48.5	6.90207	2271.5	0.210029	0.596573	3.93835	6.78869	9.9785	0-5	0.194146	0.0103793	0	0.481155	0.100846	0.00562373	0.139378	0.0562593	0.0122121	This study
	58	WLPS-58	DongshengB	40°14'30.957"	109°59'16.060"	1193	8.27667	11.7041	339.7	9.66903	50.9167	7.2607	2173.95	0.180866	0.706218	2.41259	6.56826	9.39359	0-5	0.221712	0.0102481	0	0.509691	0.0793359	0	0.132112	0.0469002	0	This study
	59	WLPS-59	DongshengB	40°14'30.849"	109°59'8.439"	1199	8.03667	13.11	339.7	9.63303	50.9167	7.2247	2173.95	0.147466	0.87691	0.409371	4.75595	8.64248	0-5	0.248431	0	0	0.54684	0.0572629	0	0.116641	0.0308253	0	This study
	60	WLPS-60	DongshengB	40°14'31.349"	109°59'6.642"	1193	7.96333	13.6672	339.7	9.66903	50.9167	7.2607	2173.95	0.152099	0.859268	0.653024	4.7024	8.81595	0-5	0.242772	0.00830009	0	0.538426	0.0596651	0	0.119526	0.0313108	0	This study
	61	WLPS-61	Erduosi	39°27'52.818"	109°49'5.756"	1396	8.22333	11.42	340.3	8.8992	49.8333	6.54087	2225.9	0.194063	0.614274	3.34301	6.86059	9.82244	0-5	0.207593	0.0128339	0	0.484502	0.0941255	0.00937396	0.135094	0.0564779	0	This study
	62	WLPS-62	Erduosi	39°27'52.290"	109°49'4.221"	1398	8.22	12.2203	340.3	8.8872	49.8333	6.52887	2225.9	0.178267	0.714158	2.28702	6.31859	9.3785	0-5	0.232987	0.0105025	0	0.507432	0.0726831	0	0.126625	0.0497703	0	This study
	63	WLPS-63	Erduosi	39°27'51.770"	109°49'6.053"	1391	8.05333	11.5174	340.3	8.9292	49.8333	6.57087	2225.9	0.193115	0.673694	2.97673	6.34245	9.64018	0-5	0.21769	0.0112004	0	0.49942	0.0807379	0	0.129769	0.052641	0.00854247	This study
	64	WLPS-64	YulinA	38°56'7.513"	109°44'35.149"	1287	7.51333	6.82138	361.95	9.8741	52.0833	7.59493	2079.3	0.183592	0.659954	2.75941	4.47701	9.45268	0-5	0.219539	0.0101143	0	0.501505	0.0871068	0	0.130549	0.0511862	0	This study
	65	WLPS-65	YulinA	38°56'7.325"	109°44'34.153"	1286	8.27667	16.9697	361.95	9.8801	52.0833	7.60093	2079.3	0.169557	0.676567	2.23013	6.18703	9.10633	0-5	0.21289	0.0121972	0	0.504321	0.100097	0.00300621	0.131109	0.0337171	0.00266267	This study
	66	WLPS-66	YulinA	38°56'6.896"	109°44'34.369"	1307	7.82333	6.621	361.95	9.7541	52.0833	7.47493	2079.3	0.173178	0.764088	1.84615	5.01257	9.20664	0-5	0.221537	0.0103725	0	0.521513	0.075195	0	0.133769	0.0376132	0	This study
	67	WLPS-67	YulinB	38°33'5.537"	109°39'28.382"	1180	7.72333	6.08622	383.6	10.837	54.3333	8.637	1932.7	0.174303	0.650294	2.52622	4.76448	9.03383	0-5	0.211418	0	0	0.508846	0.105433	0	0.135567	0.0387354	0	This study
	68	WLPS-68	YulinB	38°33'6.420"	109°39'27.774"	1175	7.99667	11.1378	383.6	10.867	54.3333	8.667	1932.7	0.190311	0.771383	2.33589	6.08585	9.52099	0-5	0.211076	0.0126093	0	0.515026	0.0733779	0	0.148897	0.0390139	0	This study
	69	WLPS-69	YulinB	38°33'5.852"	109°39'29.949"	1177	8.05	9.45017	383.6	10.855	54.3333	8.655	1932.7	0.141302	1.07438	-0.901343	4.5863	8.39572	0-5	0.290475	0.00619208	0	0.525171	0.0377344	0	0.123504	0.0169232	0	This study
	70	WLPS-70	HenshanA	38°10'56.674"	109°26'6.066"	1133	8.30667	16.6529	369.75	11.0518	52.5	8.981	1999.55	0.203308	0.764621	2.77714	7.41057	9.61956	0-5	0.227138	0	0	0.503436	0.066118	0	0.156036	0.0472721	0	This study
	71	WLPS-71	HenshanA	38°10'55.921"	109°26'5.830"	1138	8.31	14.1807	369.75	11.0218	52.5	8.951	1999.55	0.218997	0.628523	4.03517	7.94898	9.8501	0-5	0.212321	0	0	0.473414	0.0952678	0	0.164268	0.0547289	0	This study
	72	WLPS-72	HenshanA	38°10'55.095"	109°26'5.324"	1144	7.75	7.35736	369.75	10.9858	52.5	8.915	1999.55	0.195724	0.657902	3.14714	5.56286	9.73702	0-5	0.211979	0.0160975	0	0.493616	0.085734	0	0.139193	0.05338	0	This study
	73	WLPS-73	HenshanB	37°43'23.312"	109°08'52.447"	1161	8.42	9.24437	370.3	11.4271	51.5	9.34793	2012.15	0.165041	0.923519	0.689925	6.44474	8.93374	0-5	0.230792	0	0	0.550654	0.0535127	0	0.136595	0.028446	0	This study
	74	WLPS-74	HenshanB	37°43'22.916"	109°08'52.255"	1160	8.39667	8.86076	370.3	11.4331	51.5	9.35393	2012.15	0.150573	1.01777	-0.292974	5.89028	8.64962	0-5	0.245426	0	0	0.559842	0.0441592	0	0.128643	0.0219296	0	This study
	75	WLPS-75	HenshanB	37°43'22.392"	109°08'52.614"	1159	8.48333	5.42833	370.3	11.4391	51.5	9.35993	2012.15	0.184491	0.76868	2.1708	7.28152	9.28665	0-5	0.206562	0	0	0.530908	0.0780401	0	0.147047	0.0374435	0	This study
	76	WLPS-76	Jingbian	37°30'00.829"	108°51'53.886"	1677	8.27333	12.0548	384.7	8.94153	52.3333	6.72487	1957.9	0.207382	0.498873	4.41023	7.45258	9.9244	0-5	0.238681	0.0167183	0	0.433977	0.106709	0	0.131378	0.0725366	0	This study
	77	WLPS-77	Jingbian	37°30'02.562"	108°51'55.911"	1629	8.19667	13.3597	384.7	9.22953	52.3333	7.01287	1957.9	0.193563	0.470438	4.14307	6.76748	9.40098	0-5	0.233322	0	0	0.443853	0.129263	0	0.128935	0.0646278	0	This study
	78	WLPS-78	Jingbian	37°30'01.986"	108°51'58.230"	1614	8.23	11.5215	384.7	9.31953	52.3333	7.10287	1957.9	0.280796	0.404663	7.22024	9.80343	11.3286	0-5	0.197519	0	0	0.409059	0.112625	0	0.166668	0.114128	0	This study
	79	WLPS-79	Anshai	37°04'38.372"	109°04'55.748"	1203	8.3	14.2483	506.6	10.5835	60.8333	8.35013	1668	0.212338	0.575331	4.13035	7.69591	9.92564	0-5	0.209212	0	0	0.4814	0.0970506	0	0.1433	0.0690382	0	This study
	80	WLPS-80	Anshai	37°04'38.946"	109°04'55.026"	1204	8.1	15.5943	506.6	10.5775	60.8333	8.34413	1668	0.190902	0.634235	3.13186	6.40131	9.58097	0-5	0.218073	0.0102855	0	0.491967	0.0907359	0	0.13429	0.0546486	0	This study
	81	WLPS-81	Anshai	37°04'38.846"	109°04'54.684"	1207	8.37667	12.247	506.6	10.5595	60.8333	8.32613	1668	0.228328	0.608919	4.43558	8.45419	10.2181	0-5	0.201858	0	0	0.482247	0.0875672	0	0.158274	0.0700538	0	This study
	82	WLPS-82	Yanan	36°41'22.886"	109°24'57.159"	1025	8.07	16.753	514.5	12.0093	59	9.95933	1638.9	0.213984	0.470554	4.77546	7.0936	10.0431	0-5	0.19032	0.0173076	0	0.449588	0.132504	0	0.142436	0.0678446	0	This study
	83	WLPS-83	Yanan	36°41'22.605"	109°24'56.584"	1021	8.13333	19.1232	514.5	12.0333	59	9.98333	1638.9	0.219723	0.628586	4.05734	7.46821	9.98631	0-5	0.192774	0	0	0.492935	0.0945684	0	0.160591	0.0591325	0	This study
	84	WLPS-84	Yanan	36°41'24.131"	109°24'57.897"	1006	8.04333	20.249	514.5	12.1233	59	10.0733	1638.9	0.204303	0.617256	3.64356	6.691	9.8879	0-5	0.197408	0.0110352	0	0.487013	0.0972499	0.00524517	0.141882	0.054568	0.00559854	This study
	85	WLPS-85	Ganquan	36°14'09.683"	109°22'38.914"	1111	8.03	16.9418	530.6	11.4503	65.1667	8.60033	1527.7	0.243724	0.527345	5.37541	7.98175	10.7628	0-5	0.173835	0.0115892	0	0.461955	0.104719	0.00700221	0.153978	0.0781702	0.00875199	This study
	86	WLPS-86	Ganquan	36°14'09.452"	109°22'37.544"	1061	8.02667	17.7945	530.6	11.7503	65.1667	8.90033	1527.7	0.217716	0.605751	4.12459	7.09547	10.2308	0-5	0.18654	0.014496	0	0.481901	0.0958699	0.00663288	0.147794	0.0602215	0.00654479	This study
	87	WLPS-87	Ganquan	36°14'10.393"	109°22'39.430"	1068	8.02333	17.7778	530.6	11.7083	65.1667	8.85833	1527.7	0.230863	0.558089	4.80239	7.52913	10.4884	0-5	0.184782	0.0160674	0	0.464701	0.10139	0.00590548	0.149683	0.0685709	0.00890028	This study
	88	WLPS-88	Luochuan	35°42'42.520"	109°25'02.876"	1070	7.98	20.3306	592.4	12.3388	60.8333	10.5055	1558.4	0.242532	0.370745	6.22637	7.79855	10.6639	0-5	0.175098	0.0174326	0	0.413852	0.1504	0.00491351	0.139184	0.0851092	0.0140107	This study
	89	WLPS-89	Luochuan	35°42'42.495"	109°25'02.568"	1072	8.14333	18.6227	592.4	12.3268	60.8333	10.4935	1558.4	0.19966	0.522053	4.03941	6.82046	9.82834	0-5	0.206571	0.0132145	0	0.466716	0.113544	0.00293324	0.12563	0.0644982	0.00689266	This study
	90	WLPS-90	Luochuan	35°42'30.762"	109°25'11.366"	1055	8.1	19.9499	592.4	12.4288	60.8333	10.5955	1558.4	0.297486	0.416601	7.66993	9.99424	11.7892	0-5	0.140113	0.0115684	0	0.420123	0.127254	0.00689725	0.181273	0.103187	0.00958341	This study
	91	WLPS-91	Yijun	35°23'20.902"	109°07'58.947"	1357	7.60333	24.1127	676.4	11.5875	58.25	9.88753	1677.7	0.303331	0.367369	8.1303	8.77084	11.955	0-5	0.127979	0.0151782	0	0.410624	0.139325	0.00816589	0.163003	0.10686	0.028864	This study
	92	WLPS-92	Yijun	35°23'20.902"	109°07'58.947"	1357	7.58667	27.9821	676.4	11.5875	58.25	9.88753	1677.7	0.329664	0.210867	9.83396	9.61083	12.4398	0-5	0.130944	0.0163995	0	0.342536	0.176594	0.00926887	0.158075	0.131465	0.0347177	This study
	93	WLPS-93	LantianA	34°14'27.333"	109°07'27.652"	591	7.81	21.5154	636.375	14.7148	69.2708	12.8252	1455.88	0.234382	0.541466	5.00573	7.03762	10.4778	0-5	0.161187	0.0108111	0	0.477206	0.114643	0.00430539	0.154953	0.0670594	0.00983591	This study
	94	WLPS-94	LantianA	34°14'30.420"	109°07'30.744"	568	7.83667	23.5849	636.375	14.8528	69.2708	12.9632	1455.88	0.288153	0.417	7.37836	8.92651	11.717	0-5	0.127254	0.012068	0	0.441526	0.127589	0.00688637	0.161148	0.103129	0.0203989	This study
	95	WLPS-95	LantianB	34°14'22.393"	109°07'25.504"	617	7.75667	22.6814	636.375	14.5768	69.2708	12.6872	1455.88	0.307893	0.364147	8.28996	9.36313	11.9858	0-5	0.12514	0.0174382	0	0.402143	0.144641	0.00811455	0.171544	0.103403	0.0275765	This study
	96	WLPS-96	LantianB	34°14'22.705"	109°07'25.021"	623	7.88333	21.1042	636.375	14.5228	69.2708	12.6332	1455.88	0.317256	0.39373	8.41249	10.041	12.198	0-5	0.117426	0.0113573	0.00224936	0.41495	0.132432	0.00864632	0.177235	0.10675	0.0289539	This study
	97	WLPS-97	LantianB	34°14'19.807"	109°07'24.699"	609	7.80667	20.8247	636.375	14.6068	69.2708	12.7172	1455.88	0.377948	0.0608033	12.1816	11.8677	13.63	0-5	0.0929754	0.0205586	0	0.287903	0.21652	0.0118652	0.164115	0.176444	0.0296191	This study
	98	XZ-49	-	29°39.6'	90°55.7'	3696	7.18	-	426.4	-	-	8	2355.6	0.235539	0.273137	6.56303	5.27483	10.9111	Surface soil	0.136493	0.0173778	0.00375296	0.412009	0.184548	0.0152566	0.11985	0.0990454	0.0116668	Yang et al. (2012) and Xie et al. (2012)
	99	Guangcheng	-	32°26.2'	108°19.5'	481	7.20667	-	814.3	-	-	15.6	-	0.546783	0.619728	14.2464	15.8431	15.6065	Surface soil	0.0655867	0.00481729	0	0.310632	0.0677388	0.00707633	0.411429	0.10558	0.0271398	Yang et al. (2014a)
	100	Maoba-2	-	32°20.0'	108°14.4'	404	7.29	-	814.3	-	-	14.8655	-	0.457551	0.260267	13.5184	13.0734	14.6911	Surface soil	0.0906377	0.0132831	0.00218651	0.289402	0.145799	0.00821962	0.266971	0.158884	0.024618	Yang et al. (2014a)
	101	CD-7	-	30°40.9'	103°49.2'	530	7.37667	-	870.1	-	-	16.1	993.3	0.545833	-0.0564582	18.0509	16.2973	17.2662	0-5	0.0572261	0.0141891	0.00375869	0.173746	0.186196	0.028848	0.220964	0.262239	0.0528331	Yang et al. (2012) and Xie et al. (2012)
	102	CD-2	-	30°40.9'	103°49.2'	530	7.37667	-	870.1	-	-	16.1	993.3	0.502563	0.549702	13.2726	14.8386	15.1094	0-5	0.0646605	0.00632716	0	0.330247	0.0813272	0.0180556	0.328241	0.104475	0.0666667	Yang et al. (2012) and Xie et al. (2012)
	103	CD-5	-	30°40.9'	103°49.2'	530	7.46333	-	870.1	-	-	16.1	993.3	0.651533	0.495226	18.1996	20.1083	17.7405	0-5	0.0297875	0.00328701	0.000498776	0.244159	0.0670976	0.00610387	0.467917	0.160606	0.0205438	Yang et al. (2012) and Xie et al. (2012)
	104	TS-5	-	34°34.4'	105°36.4'	1307	7.53333	-	491.6	-	-	11	1379.4	0.158157	0.749276	1.46448	3.67681	9.0053	Surface soil	0.27505	0.0104801	0.00215959	0.488338	0.0631738	0.00463995	0.109627	0.0433425	0.00318893	Yang et al. (2014a)
	105	LP-30 (Yan'an）	-	36°24.2'	109°30.3'	1233	7.55	-	510.7	-	-	9.9	1618.3	0.20202	0.202915	5.92208	5.20308	9.84116	Surface soil	0.22477	0.02428	0.00126068	0.348681	0.198481	0.00566788	0.10379	0.0850836	0.00798599	Xie et al. (2012)
	106	LP-17 (Pinglu)	-	39°38.8'	112° 5.1'	1719	7.58	-	383.1	-	-	7.2	1918.8	0.137436	0.744769	0.84769	3.11178	8.3927	Surface soil	0.3087	0.013058	0.00120422	0.463732	0.0739372	0.00389179	0.100867	0.0277018	0.00690722	Yang et al. (2014a)
	107	TS-3	-	34°34.4'	105°36.4'	1307	7.60333	-	491.6	-	-	11	1379.4	0.271365	0.464188	6.59037	7.69324	11.2899	Surface soil	0.240978	0.0142423	0	0.388829	0.0818024	0.00664816	0.155268	0.105053	0.0071786	Yang et al. (2014a)
	108	TS-1	-	34°34.4'	105°36.4'	1307	7.62	-	491.6	-	-	11	1379.4	0.209636	0.674601	3.48372	5.66002	9.79844	Surface soil	0.307272	0.00957729	0.00174684	0.415389	0.0545184	0.00423484	0.139356	0.0628392	0.00506693	Yang et al. (2014a)
	109	XN 2-0	-	36°31'	101°52'	2250	7.63	-	373.6	-	-	6.1	1586	0.0819361	1.2152	-3.54018	1.38387	6.97774	Surface soil	0.44842	0.00830989	0	0.437969	0.0240461	0	0.0740992	0.00715604	0	Yang et al. (2014a)
	110	LP-33(Yijun)	-	35°27.6'	109° 7.0'	1009	7.64667	-	674.7	-	-	9.3	1705.2	0.196722	0.538438	3.85543	5.30096	9.7209	Surface soil	0.226614	0.0123765	0.000566769	0.454893	0.106588	0.00478619	0.122982	0.0606715	0.0105221	Yang et al. (2014a)
	111	XN 1-0	-	36°31'	101°52'	2250	7.67333	-	373.6	-	-	6.1	1586	0.100193	1.28631	-3.3774	2.12325	7.36765	Surface soil	0.430726	0.00899788	0	0.444296	0.0166883	0	0.0884217	0.0108702	0	Yang et al. (2014a)
	112	LP-16 (Beibao)	-	39°39.1'	111°52.5'	1489	7.73	-	383.1	-	-	7.2	1918.8	0.170621	0.885818	1.07665	4.65942	8.88561	Surface soil	0.301546	0.011414	0	0.45824	0.0541676	0.00595963	0.136981	0.0232626	0.00842909	Yang et al. (2014a)
	113	LP-15 (Helingeer)	-	40°12.9'	111°41.1'	1144	7.74	-	397.9	-	-	6.9	1819.2	0.176394	0.734262	2.11496	4.88265	9.3335	Surface soil	0.2506	0.010014	0	0.490053	0.0681405	0.006564	0.123036	0.0449109	0.00668084	Yang et al. (2014a)
	114	Xunyangba-2	-	33°33.8'	108°36.0'	1037	7.76	-	924	-	-	11.4	-	0.194353	0.340071	4.90673	5.54523	9.54604	Surface soil	0.245064	0.0181088	0	0.381229	0.159702	0.00506304	0.118215	0.06825	0.00436801	Xie et al. (2012)
	115	HS-S-2	-	30°27.0'	110° 25.2'	ca. 294	7.77667	-	1138	-	-	16.8	-	0.433827	-0.0735656	14.6758	13.6656	15.0923	Surface soil	0.103362	0.0272192	0.00262273	0.217771	0.212508	0.0156355	0.158104	0.232784	0.0299933	Yang et al. (2012) and Xie et al. (2012)
	116	XN 3-0	-	36°31'	101°52'	2250	7.77667	-	373.6	-	-	6.1	1586	0.182961	1.25266	-0.620768	5.20889	8.81386	Surface soil	0.344073	0.00560755	0	0.443744	0.02096	0.00368058	0.162709	0.0129351	0.00629107	Yang et al. (2014a)
	117	LP-1 (Xiyu)	-	34°54.9'	109°38.8'	431	7.79333	-	522.4	-	-	13.3	1281.9	0.20465	0.656816	3.43002	5.9877	10.0135	Surface soil	0.233622	0.00732127	0	0.484894	0.0655183	0.00549259	0.126769	0.0692852	0.00709752	Xie et al. (2012)
	118	LP-11 (Yangqu)	-	38°12.3'	112°37.6'	988	7.84	-	431.2	-	-	10	-	0.137732	0.733135	0.922807	3.86534	8.54934	Surface soil	0.304201	0.0119913	0.00242195	0.470023	0.0692789	0.00633679	0.0957655	0.0350265	0.00495459	Yang et al. (2014a)
	119	LP-3 (Xiyu)	-	35°33.4'	110°30.6'	402	7.85667	-	556	-	-	13.6	-	0.180491	0.714172	2.35588	5.35443	9.36942	Surface soil	0.24891	0.00913845	0	0.495076	0.0680339	0	0.123039	0.0513644	0.00443815	Xie et al. (2012)
	120	LP-9 (Lishi)	-	36°53.8'	111°47.2'	1019	7.87667	-	454.9	-	-	10.6	-	0.183605	0.751277	2.24201	5.51658	9.40314	Surface soil	0.247199	0.00927542	0	0.493322	0.0654012	0.00290057	0.132419	0.045536	0.00394631	Yang et al. (2014a)
	121	LP-10 (Qixian)	-	37° 9.3'	112° 9.8'	784	7.87667	-	454.9	-	-	10.6	-	0.151869	0.911204	0.351416	4.44677	8.69807	Surface soil	0.257664	0.00889571	0.00120464	0.522293	0.0579755	0.00163225	0.127274	0.0217129	0.00134816	Xie et al. (2012)
	122	LP-31 (Yan'an）	-	35°55.9'	109°28.6'	1008	7.93667	-	510.7	-	-	9.9	1507.1	0.215594	0.56385	4.29638	6.76653	10.1355	Surface soil	0.181514	0.017283	0	0.470143	0.112742	0.00645106	0.148938	0.0562843	0.00664547	Yang et al. (2014a)
	123	HS-S-11	-	30°27.0'	110° 25.2'	ca. 294	7.95	-	1138	-	-	16.8	-	0.401345	-0.0322734	13.4347	13.0663	14.27	Surface soil	0.11188	0.0253045	0.00155201	0.240157	0.217652	0.0128884	0.154425	0.207261	0.0288809	Yang et al. (2012) and Xie et al. (2012)
	124	LP-8 (Lishi)	-	36°50.2'	111°45.5'	709	7.96	-	454.9	-	-	10.6	-	0.116026	0.890217	-0.640723	3.47684	8.08589	Surface soil	0.281162	0.00966321	0	0.534245	0.0600252	0	0.0922451	0.0206422	0.00201758	Xie et al. (2012)
	125	LP-25 (Jingbian)	-	37°30.2'	108°52.2'	1591	7.97	-	395	-	-	8.2	1935.5	0.123954	0.865919	-0.257171	3.7727	7.94093	Surface soil	0.340927	0	0	0.482474	0.0526445	0	0.0921974	0.0260096	0.00574747	Yang et al. (2014a)
	126	HS-S-6	-	30°27.0'	110° 25.2'	ca. 294	7.98	-	1138	-	-	16.8	-	0.406052	-0.0914225	13.916	13.3108	14.4611	Surface soil	0.117488	0.0264806	0.00227318	0.221216	0.223888	0.0142772	0.1399	0.22002	0.0344566	Yang et al. (2012) and Xie et al. (2012)
	127	LP-23 (Zizhou)	-	37°32.8'	109°30.2'	1033	7.98667	-	428.3	-	-	9.3	1800.3	0.242059	0.588121	4.97917	7.80167	10.6845	Surface soil	0.173163	0.00903237	0	0.48928	0.0886529	0	0.155367	0.0777377	0.00676795	Yang et al. (2014a)
	128	LP-20 (Fenyang)	-	37°15.0'	111°38.1'	1025	7.99667	-	454.9	-	-	10.6	-	0.277567	0.447634	6.8765	9.02726	10.9907	Surface soil	0.266832	0	0	0.365779	0.0898217	0	0.174577	0.102991	0	Yang et al. (2014a)
	129	LP-28 (Tanjiaying)	-	36°58.7'	109°15.4'	1111	8.00667	-	497.8	-	-	8.9	1657.6	0.155427	0.459689	3.0218	4.93851	8.79641	Surface soil	0.268593	0.0199846	0	0.419092	0.135671	0.00433897	0.101714	0.0452036	0.00540336	Yang et al. (2014a)
	130	LP-7 (Huozhou)	-	36°35.1'	111°41.1'	597	8.01667	-	468.5	-	-	12.6	-	0.213029	0.600778	4.0075	6.90889	10.1435	Surface soil	0.224126	0.0135984	0	0.464087	0.0825142	0.00554185	0.136061	0.0679666	0.00610488	Xie et al. (2012)
	131	LP-5 (Xiangfen)	-	35°47.9'	111°18.6'	472	8.02333	-	493	-	-	12.7	-	0.227137	0.667332	4.06747	7.40351	10.2449	Surface soil	0.179511	0.0104766	0	0.493131	0.0887848	0.00334013	0.166197	0.0530532	0.0055069	Yang et al. (2014a)
	132	LP-27 (Liandaowan)	-	37°12.1'	108°59.2'	-	8.02667	-	395	-	-	8.2	1935.5	0.233839	1.12368	1.68774	7.63898	10.0458	Surface soil	0.235716	0.00450976	0	0.498889	0.0244937	0.00360781	0.199336	0.028025	0.0054238	Yang et al. (2014a)
	133	Maoba-1	-	32°18.5'	108°12.0'	822	8.04	-	814.3	-	-	12.1485	-	0.341148	0.124441	10.68	11.2945	12.7555	Surface soil	0.141873	0.0213518	0.00126816	0.298423	0.193356	0.0102972	0.158666	0.149852	0.0249131	Yang et al. (2014a)
	134	LP-4（Hejin)	-	35°38.2'	110°45.0'	464	8.05	-	493	-	-	12.7	-	0.264677	0.498386	6.18914	8.74527	11.1442	Surface soil	0.187181	0.0110414	0	0.436637	0.0977387	0.00564722	0.159639	0.0915285	0.0105871	Xie et al. (2012)
	135	LP-13 (Pinglu)	-	39°36.3'	112°15.7'	1664	8.07	-	383.1	-	-	7.2	1918.8	0.105795	0.905137	-1.04249	3.44654	7.72743	Surface soil	0.359734	0.0103056	0	0.473231	0.0493317	0.00269357	0.0807884	0.0195932	0.00432298	Yang et al. (2014a)
	136	LP-26 (Tianciwan)	-	37°21.1'	108°56.6'	1564	8.07333	-	395	-	-	8.2	1935.5	0.153012	1.25532	-1.5643	5.04778	8.42966	Surface soil	0.306056	0	0	0.516962	0.0239699	0	0.14046	0.0125521	0	Yang et al. (2014a)
	137	DY-2	-	37°29.5'	118° 23.3'	8	8.09333	-	568.5	-	-	12.6	1754.5	0.284211	0.0939286	9.08795	9.52767	10.89	Surface soil	0.477193	0	0	0.166667	0.0719298	0	0.108772	0.150877	0.0245614	Yang et al. (2012) and Xie et al. (2012)
	138	LP-12 (Yanmenguan)	-	39° 9.8'	112°46.7'	1407	8.12667	-	383.1	-	-	7.2	1918.8	0.147807	0.775817	0.993139	5.02485	8.71723	Surface soil	0.275147	0.0105647	0.00153017	0.493338	0.0686156	0.0047846	0.108651	0.0322563	0.00511251	Xie et al. (2012)
	139	LP-2 (Xiyu)	-	35°12.0'	110° 8.2'	701	8.13667	-	534.967	-	-	11.7667	-	0.233177	0.551857	4.90944	7.93125	10.3532	Surface soil	0.250393	0	0	0.441502	0.0749284	0	0.139548	0.0881539	0.00547464	Xie et al. (2012)
	140	10NJS-2	-	34°21.0'	109°32.0'	637	8.17333	-	553.3	-	-	13.7	1426.9	0.326882	0.28516	9.32648	11.1949	12.4028	0-5	0.143509	0.0151873	0.00177667	0.358962	0.150656	0.00857172	0.175622	0.126585	0.01913	Yang et al. (2014a)
	141	LP-14 (Qinshuihexian)	-	39°54.6'	111°46.8'	1476	8.18667	-	383.1	-	-	7.2	1918.8	0.214945	0.334844	5.57471	7.45965	10.0323	Surface soil	0.241894	0.0185174	0	0.367838	0.150088	0.0106984	0.120407	0.0757557	0.0148013	Yang et al. (2014a)
	142	LP-32 (Luochuan）	-	35°43.9'	109°20.9'	967	8.20333	-	590.2	-	-	9.5	1550	0.22605	0.481938	5.08497	7.88169	10.3714	Surface soil	0.220299	0.0156723	0	0.43024	0.106724	0.00455724	0.135477	0.0797715	0.00725938	Xie et al. (2012)
	143	10NJS-4	-	34°21.0'	109°32.0'	637	8.22333	-	553.3	-	-	13.7	1426.9	0.326809	0.162332	10.0207	11.3355	12.5157	0-10	0.132891	0.0223355	0.00119692	0.325789	0.189563	0.00910576	0.155252	0.141457	0.02241	Yang et al. (2014a)
	144	DY-3	-	37°29.5'	118° 23.3'	8	8.22333	-	568.5	-	-	12.6	1754.5	0.396204	0.284474	11.4794	13.6748	13.578	Surface soil	0.126216	0	0	0.326928	0.13618	0.0144721	0.212574	0.144009	0.0396204	Yang et al. (2012) and Xie et al. (2012)
	145	10NJS-3	-	34°21.0'	109°32.0'	637	8.23	-	553.3	-	-	13.7	1426.9	0.347905	0.233889	10.2689	12.0657	12.8881	0-10	0.132476	0.0176221	0	0.339996	0.159036	0.00909518	0.178178	0.143368	0.0202287	Yang et al. (2014a)
	146	10NJS-5	-	34°21.0'	109°32.0'	637	8.23667	-	553.3	-	-	13.7	1426.9	0.361602	0.183043	10.9818	12.5465	13.3513	-	0.109183	0.018765	0.00184389	0.333228	0.171607	0.0112223	0.173008	0.160507	0.0206352	Yang et al. (2014a)
	147	DY-A	-	37°29.5'	118° 23.3'	8	8.25	-	568.5	-	-	12.6	1754.5	0.350541	0.253924	10.237	12.2117	13.0376	Surface soil	0.114001	0.0101522	0.00209692	0.352922	0.156502	0.0180795	0.178877	0.139854	0.0275157	Yang et al. (2012) and Xie et al. (2012)
	148	LP-18 （Youyao)	-	39° 1.9'	112°21.4'	1455	8.26333	-	383.1	-	-	7.2	1918.8	0.22661	0.404757	5.53994	8.07215	9.86185	Surface soil	0.256968	0	0	0.382476	0.133947	0	0.150634	0.075976	0	Yang et al. (2014a)
	149	10NJS-1	-	34°21.0'	109°32.0'	637	8.27333	-	553.3	-	-	13.7	1426.9	0.295009	0.470008	7.29033	10.4065	11.6974	0-10	0.171359	0.0118604	0	0.415585	0.10273	0.0069549	0.180441	0.0992302	0.0118392	Yang et al. (2014a)
	150	DY-1	-	37°29.5'	118° 23.3'	8	8.31667	-	568.5	-	-	12.6	1754.5	0.336423	0.358341	9.20733	11.9265	12.6057	Surface soil	0.176725	0.0563614	0	0.316687	0.120917	0.0118481	0.184476	0.0986602	0.0343262	Yang et al. (2012) and Xie et al. (2012)
	151	LP-19 (Jiaocheng)	-	37°29.7'	112° 2.7'	774	8.33333	-	431.2	-	-	10	-	0.246618	0.518318	5.51629	8.94683	10.2606	Surface soil	0.233654	0	0	0.415336	0.104392	0	0.156302	0.0689104	0.0214052	Yang et al. (2014a)
	152	Yancheng	-	-	-	-	8.33333	-	1051.1	-	-	14.6	1344.6	0.435353	0.173242	13.3237	15.3091	14.7531	surface soil	0.0872537	0.01425	0.00632072	0.261505	0.164336	0.039937	0.214056	0.15481	0.0575307	Yang et al. (2014a)
	153	LP-6 (Hongtong)	-	36°13.6'	111°40.5'	472	8.33667	-	468.5	-	-	12.6	-	0.19581	0.552506	3.74741	7.24363	9.63588	Surface soil	0.239284	0.0172073	0	0.447292	0.103775	0	0.133392	0.0590491	0	Xie et al. (2012)
	154	TJ-9	-	38°42.9'	117°27.6'	0.9	8.38333	-	544.3	-	-	12.6	1632.2	0.352819	0.294371	10.0783	12.6699	12.7175	0-9.5	0.183247	0.020615	0.00210005	0.298086	0.134483	0.0166638	0.198419	0.117601	0.0287849	Yang et al. (2014a)
	155	DYLJ-3	-	37°29.6'	118° 15.3'	9	8.39667	-	568.5	-	-	12.6	1754.5	0.326209	0.163383	9.9961	11.811	12.762	Surface soil	0.120671	0.0159337	0	0.319737	0.187805	0.0348417	0.150414	0.134693	0.035904	Yang et al. (2012) and Xie et al. (2012)
	156	LP-24 (Jingbian)	-	37°36.4'	108°50.2'	1320	8.47	-	395	-	-	8.2	1935.5	0.157985	0.703556	1.71837	6.34988	8.86125	Surface soil	0.274927	0.0120545	0	0.481464	0.0754738	0	0.108494	0.041286	0.00630104	Yang et al. (2014a)
	157	PJ-6	-	-	-	6	8.48667	-	643.4	-	-	9.5	1644	0.330194	0.318335	9.24107	12.2027	12.4529	0-10	0.145758	0.0141596	0.00185441	0.358857	0.141581	0.0128832	0.186153	0.120202	0.018552	Yang et al. (2014a)
	158	LP-21	-	37°25.0'	110°53.3'	867	8.57667	-	428.8	-	-	9.1	2152.3	0.246174	0.458793	5.84002	9.62778	10.2947	Surface soil	0.263889	0	0	0.383519	0.106419	0	0.162687	0.0834865	0	Yang et al. (2014a)
	159	TJ-3	-	38°44.5'	117°28.7'	0.6	8.64333	-	544.3	-	-	12.6	1632.2	0.294793	0.489585	7.17263	11.4574	11.1051	0-9.5	0.240038	0.0168149	0	0.339583	0.108047	0.00568171	0.207621	0.0691949	0.0130195	Yang et al. (2014a)
	160	TJ-1	-	38°42.7'	117°31.3'	1	8.67	-	544.3	-	-	12.6	1632.2	0.359587	0.40935	9.63618	13.7179	12.7341	0-10	0.181937	0.0160149	0	0.330437	0.104801	0.0129811	0.219334	0.109405	0.025089	Yang et al. (2014a)
	161	DYLJ-1	-	37°29.6'	118° 15.3'	9	8.68667	-	568.5	-	-	12.6	1754.5	0.31213	0.253103	9.05093	12.1658	12.1977	Surface soil	0.121514	0.0214393	0.00397301	0.348426	0.181859	0.0185907	0.175487	0.110645	0.018066	Yang et al. (2012) and Xie et al. (2012)
	162	TJ-6	-	38°42.7'	117°26.7'	0.9	8.74	-	544.3	-	-	12.6	1632.2	0.404396	0.276677	11.7775	15.4286	13.9532	0-6	0.13758	0.0118705	0	0.30156	0.123462	0.0259319	0.205595	0.144742	0.0492587	Yang et al. (2014a)
	163	LP-22 (Zhongjiao)	-	37°34.3'	110°30.7'	1001	8.95667	-	428.8	-	-	9.9	2152.3	0.273725	0.714286	5.24548	11.6433	10.3994	Surface soil	0.286904	0	0	0.375922	0.0634488	0	0.221776	0.0519493	0	Yang et al. (2014a)
	164	Wudachi	-	37°45.9'	107° 25.7'	1293	9.14	-	273.5	-	-	8.3	2041.8	0.242118	0.609856	4.85778	11.1022	10.2019	Surface soil	0.243331	0	0	0.433306	0.0812449	0	0.178254	0.0638642	0	Yang et al. (2012) and Xie et al. (2012)
	165	PJ-4	-	-	-	6	9.19667	-	643.4	-	-	9.5	1644	0.327635	0.395111	8.72639	14.147	12.1516	0-9	0.151539	0.0164081	0	0.366341	0.133054	0.0103992	0.206898	0.0978126	0.0175484	Yang et al. (2014a)
		"-" indicates that data are not available.
